# Supplementary material for: Metagenomic Study of Fungal Microbial Communities in Two PDO Somontano Vineyards (Huesca, Spain): Effects of Age, Plant Genotype, and Initial Phytosanitary Status on the Priming and Selection of their Associated Microorganisms
Source: MDPI journal article supplement (doi:10.3390/plants12122251), 2023-06-08
Supplement: s1 [file s1]

# Metagenomic Study of Fungal Microbial Communities in Vineyards of PDO Somontano (Huesca, Spain): Effects of Microbial Priming on Phytosanitary Traits of Different Grapevine Genotypes

Natalia Langa-Lomba, Jerome Grimplet, Eva Sánchez-Hernández, Pablo Martín-Ramos, José Casanova-Gascón, Carmen Julián-Lagunas, and Vicente González-García

## SUPPLEMENTARY MATERIAL

**Table S1.** Fungal OTUs isolated by microbiological methods and identified from surveyed plants in “Clau” vineyard.

| ROW/PLANT | VINEYARD | ISOLATE                            |
|-----------|----------|------------------------------------|
| T 1,1     | “Clau”   | <i>Diplodia seriata</i>            |
| T 1,1     | “Clau”   | <i>Neofusicoccum parvum</i>        |
| T 1,1     | “Clau”   | <i>Diplodia seriata</i>            |
| T 1,2     | “Clau”   | <i>Rhizoctonia solani</i>          |
| T 1,2     | “Clau”   | <i>Neofusicoccum parvum</i>        |
| T 1,2     | “Clau”   | <i>Diplodia seriata</i>            |
| T 1,3     | “Clau”   | <i>Trichoderma ghanense</i>        |
| T 1,4     | “Clau”   | <i>Eutypa lata</i>                 |
| T 1,4     | “Clau”   | <i>Diplodia seriata</i>            |
| T 1,5     | “Clau”   | <i>Discostroma fuscillum</i>       |
| T 2,1     | “Clau”   | <i>Neofusicoccum parvum</i>        |
| T 2,1     | “Clau”   | <i>Diplodia seriata</i>            |
| T 2,2     | “Clau”   | <i>Diplodia seriata</i>            |
| T 2,3     | “Clau”   | <i>Trichoderma aureoviride</i>     |
| T 2,3     | “Clau”   | <i>Gibberella fujikuroi</i>        |
| T 2,4     | “Clau”   | <i>Diplodia seriata</i>            |
| T 2,4     | “Clau”   | <i>Aureobasidium pullulans</i>     |
| T 2,4     | “Clau”   | <i>Neofusicoccum parvum</i>        |
| T 2,4     | “Clau”   | <i>Rhizopus</i> sp.                |
| T 2,5     | “Clau”   | <i>Diplodia seriata</i>            |
| T 2,5     | “Clau”   | <i>Epicoccum purpurascens</i>      |
| T 2,5     | “Clau”   | <i>Neofusicoccum parvum</i>        |
| T 2,5     | “Clau”   | <i>Didymella glomerata</i>         |
| T 3,1     | “Clau”   | <i>Epicoccum purpurascens</i>      |
| T 3,1     | “Clau”   | <i>Neofusicoccum parvum</i>        |
| T 3,1     | “Clau”   | <i>Diplodia seriata</i>            |
| T 3,2     | “Clau”   | <i>Phaeomoniella chlamydospora</i> |
| T 3,2     | “Clau”   | <i>Epicoccum purpurascens</i>      |
| T 3,3     | “Clau”   | <i>Neofusicoccum parvum</i>        |
| T 3,3     | “Clau”   | <i>Fusarium oxysporum</i>          |
| T 3,3     | “Clau”   | <i>Phaeoacremonium aleophilum</i>  |
| T 3,3     | “Clau”   | <i>Diplodia seriata</i>            |
| T 3,4     | “Clau”   | <i>Diplodia seriata</i>            |
| T 3,5     | “Clau”   | <i>Neofusicoccum parvum</i>        |
| T 3,5     | “Clau”   | <i>Phaeoacremonium aleophilum</i>  |
| T 3,5     | “Clau”   | <i>Diplodia seriata</i>            |
| T 4,1     | “Clau”   | <i>Diplodia seriata</i>            |
| T 4,2     | “Clau”   | <i>Neofusicoccum parvum</i>        |
| T 4,2     | “Clau”   | <i>Gibberella</i> sp.              |
| T 4,2     | “Clau”   | <i>Epicoccum purpurascens</i>      |
| T 4,3     | “Clau”   | <i>Eutypa lata</i>                 |
| T 4,3     | “Clau”   | <i>Fusarium oxysporum</i>          |
| T 4,4     | “Clau”   | <i>Diplodia seriata</i>            |
| T 4,4     | “Clau”   | <i>Phaeomoniella chlamydospora</i> |
| T 4,5     | “Clau”   | <i>Diplodia seriata</i>            |

**Table S2.** Fungal OTUs isolated by microbiological methods and identified from surveyed plants in “Almendros” vineyard

| ROW/PLANT | VINEYARD    | ISOLATE                            |
|-----------|-------------|------------------------------------|
| T 5,1     | “Almendros” | <i>Fusarium oxysporum</i>          |
| T 5,1     | “Almendros” | <i>Gibberella fujikuroi</i>        |
| T 5,1     | “Almendros” | <i>Didymella glomerata</i>         |
| T 5,2     | “Almendros” | <i>Fusarium oxysporum</i>          |
| T 5,3     | “Almendros” | <i>Epicoccum purpurascens</i>      |
| T 5,3     | “Almendros” | <i>Neofusicoccum parvum</i>        |
| T 5,4     | “Almendros” | <i>Epicoccum purpurascens</i>      |
| T 5,4     | “Almendros” | <i>Trichoderma ghanense</i>        |
| T 6,1     | “Almendros” | <i>Neofusicoccum parvum</i>        |
| T 6,1     | “Almendros” | <i>Diplodia seriata</i>            |
| T 6,2     | “Almendros” | <i>Epicoccum purpurascens</i>      |
| T 6,3     | “Almendros” | <i>Aspergillus niger</i>           |
| T 6,3     | “Almendros” | <i>Cylindrocarpon macrodydimum</i> |
| T 6,4     | “Almendros” | <i>Epicoccum nigrum</i>            |
| T 6,4     | “Almendros” | <i>Cylindrocarpon</i> sp.          |
| T 6,5     | “Almendros” | <i>Diplodia seriata</i>            |
| T 6,5     | “Almendros” | <i>Epicoccum nigrum</i>            |
| T 6,5     | “Almendros” | <i>Didymosphaeria variabile</i>    |
| T 7,1     | “Almendros” | <i>Epicoccum purpurascens</i>      |
| T 7,2     | “Almendros” | <i>Fusarium oxysporum</i>          |
| T 7,3     | “Almendros” | <i>Phomopsis viticola</i>          |
| T 7,3     | “Almendros” | <i>Epicoccum nigrum</i>            |
| T 7,4     | “Almendros” | <i>Trichodema viride</i>           |
| T 7,4     | “Almendros” | <i>Aspergillus</i> sp.             |
| T 7,5     | “Almendros” | <i>Diplodia seriata</i>            |
| T 7,5     | “Almendros” | <i>Epicoccum purpurascens</i>      |
| T 8,1     | “Almendros” | <i>Aspergillus niger</i>           |
| T 8,1     | “Almendros” | <i>Diplodia seriata</i>            |
| T 8,2     | “Almendros” | <i>Eutypa lata</i>                 |
| T 8,3     | “Almendros” | <i>Phoma conidiogena</i>           |
| T 8,4     | “Almendros” | <i>Cylindrocarpon macrodydimum</i> |
| T 8,4     | “Almendros” | <i>Epicoccum purpurascens</i>      |
| T 8,5     | “Almendros” | <i>Diplodia seriata</i>            |
| T 8,5     | “Almendros” | <i>Epicoccum purpurascens</i>      |
| T 8,5     | “Almendros” | <i>Alternaria</i> sp.              |
